# Supplementary material for: Domains of quality for clinical ethics case consultation: a mixed-method systematic review
Source: PubMed Central journal article supplement (PMC4897931; doi:10.1186/s13643-016-0273-x), 2016-06-07
Supplement: 13643_2016_273_MOESM1_ESM.pdf [file 13643_2016_273_MOESM1_ESM.pdf]

### Additional file 1. Sample Ovid MEDLINE Search

|                 |                                                                                                                                                                                                                                                                                        |
|-----------------|----------------------------------------------------------------------------------------------------------------------------------------------------------------------------------------------------------------------------------------------------------------------------------------|
| Ovid Medline    | Search executed 7/6/2015 results 6209                                                                                                                                                                                                                                                  |
| <i>Concepts</i> | Ethics Consult                                                                                                                                                                                                                                                                         |
| Free-text words | ((bioethic* or ethic*) adj3 (consult* or dialogue* or discussion* or talk* or session* or meeting* or examination* or service* or counsel* or mediat*) or ((clinic* or medical or healthcare or health care or hospital*) adj4 (ethic* committee* or bioethic* committee*))).tw,kf. or |
| MeSH            | ethics consultation/ or ethics committees, clinical/                                                                                                                                                                                                                                   |
